# Supplementary material for: Safety and Efficacy of Lebrikizumab in Adolescent Patients with Moderate-to-Severe Atopic Dermatitis: A 52-Week, Open-Label, Phase 3 Study
Source: PubMed Central journal article supplement — Dermatol Ther (Heidelb). 2023 Jun 15;13(7):1517–34. doi: 10.1007/s13555-023-00942-y (PMC10307734; doi:10.1007/s13555-023-00942-y), 2023-06-15
Supplement: 13555_2023_942_MOESM2_ESM.pdf [file 13555_2023_942_MOESM2_ESM.pdf]

**Title:** Safety and Efficacy of Lebrikizumab in Adolescent Patients with Moderate-to-Severe Atopic Dermatitis: A 52-Week, Open-Label, Phase 3 Study

**Running head:** Lebrikizumab in adolescent patients with moderate-to-severe atopic dermatitis

Amy S. Paller, MD, MS<sup>1</sup>, Carsten Flohr, MD, PhD<sup>2</sup>, Lawrence F. Eichenfield, MD<sup>3</sup>, Alan D. Irvine, MD<sup>4</sup>, Jamie Weisman, MD<sup>5</sup>, Jennifer Soung, MD<sup>6</sup>, Ana Pinto Correia, PhD<sup>7</sup>, Chitra R. Natalie, MD<sup>7</sup>, Claudia Rodriguez Capriles, MD<sup>7</sup>, Evangeline Pierce, PhD<sup>7</sup>, Sarah Reifeis, PhD<sup>7</sup>, Renata Gontijo Lima, MD<sup>7</sup>, Clara Armengol Tubau, PhD<sup>8</sup>, Vivian Laquer, MD<sup>9</sup>, Stephan Weidinger, MD<sup>10</sup>

<sup>1</sup>Northwestern University Feinberg School of Medicine, Chicago, Illinois, USA; <sup>2</sup>St John's Institute of Dermatology, King's College London, London, UK; <sup>3</sup>University of California, San Diego, USA; <sup>4</sup>Clinical Medicine, Trinity College Dublin, Ireland; <sup>5</sup>Medical Dermatology Specialists, Atlanta, Georgia, USA; <sup>6</sup>Southern California Dermatology, Inc., Santa Ana, California, USA; <sup>7</sup>Eli Lilly and Company, Indianapolis, USA; <sup>8</sup>Almirall S.A., Barcelona, ESP; <sup>9</sup>First OC Dermatology Research, California, USA; <sup>10</sup>Department of Dermatology and Allergy, University Hospital Schleswig-Holstein, Kiel, Germany

**Corresponding author details:** Amy Paller, MD, MS, Northwestern University, Chicago, Illinois, USA (apaller@northwestern.edu).

## SUPPLEMENTARY MATERIAL

### eMethods

#### Inclusion Criteria

To be eligible for the study, a patient must have

- been an adolescent aged 12 years and older but less than 18 years and weighing 40 or more kilograms,
- had a diagnosis of chronic AD as defined by the American Academy of Dermatology Consensus Criteria, for at least 1 year before the screening visit,
- had moderate-to-severe AD, defined as having all the following at the baseline visit
  - EASI  $\geq$ 16
  - IGA score  $\geq$ 3
  - BSA  $\geq$ 10%, and
- been a candidate for systemic therapy.

#### Exclusion Criteria

- uncontrolled chronic disease that might require bursts of oral corticosteroids,
- diagnosed active endoparasitic infections or at high risk of these infections,
- history of malignancy, including mycosis fungoides, within 5 years before the screening visit, except the following
  - completely treated in situ carcinoma of the cervix
  - completely treated and resolved non-metastatic squamous or basal cell carcinoma of the skin, and
- severe concomitant illness (es) or any medical or psychological condition that would adversely affect the participant's participation in the study.

**Table S1:** Summary of type of atopic dermatitis medication used through Week 52 in the safety population. Data are presented as n (%).

| <b>Rescue Therapy <sup>a</sup></b>         | <b>LEB 250mg Q2W (N=206)<br/>n (%)</b> |
|--------------------------------------------|----------------------------------------|
| <b>Patients with ≥1 rescue therapy</b>     | <b>56 (27.2)</b>                       |
| <b>Topical therapy</b>                     | <b>56 (27.2)</b>                       |
| <b>Topical corticosteroids</b>             | <b>54 (26.2)</b>                       |
| <b><i>Low- to moderate-potency TCS</i></b> | <b>38 (18.4)</b>                       |
| <i>Triamcinolone</i>                       | 23 (11.2)                              |
| <i>Hydrocortisone</i>                      | 17 (8.3)                               |
| <i>Desonide</i>                            | 4 (1.9)                                |
| <i>Betamethasone; fusidic acid</i>         | 1 (0.5)                                |
| <i>Dexamethasone; gentamicin</i>           | 1 (0.5)                                |
| <i>Fusidic acid; hydrocortisone</i>        | 1 (0.5)                                |
| <i>Hydrocortisone; natamycin; neomycin</i> | 1 (0.5)                                |
| <i>Prednisone</i>                          | 1 (0.5)                                |
| <b><i>High-potency TCS</i></b>             | <b>21 (10.2)</b>                       |
| <i>Mometasone</i>                          | 14 (6.8)                               |
| <i>Desoximetasone</i>                      | 2 (1.0)                                |
| <i>Betamethasone</i>                       | 1 (0.5)                                |
| <i>Clobetasol</i>                          | 1 (0.5)                                |
| <i>Fluocinolone acetonide</i>              | 1 (0.5)                                |
| <i>Fluocinonide</i>                        | 1 (0.5)                                |
| <i>Fluticasone</i>                         | 1 (0.5)                                |
| <i>Methylprednisolone</i>                  | 1 (0.5)                                |
| <b>Topical calcineurin inhibitor</b>       | <b>13 (6.3)</b>                        |
| <i>Tacrolimus</i>                          | 8 (3.9)                                |
| <i>Pimecrolimus</i>                        | 5 (2.4)                                |
| <b>Crisaborole</b>                         | <b>0</b>                               |
| <b>Systemic therapy</b>                    | <b>5 (2.4)</b>                         |
| <b>Systemic corticosteroids</b>            | <b>5 (2.4)</b>                         |

| <b>Rescue Therapy <sup>a</sup></b>       | <b>LEB 250mg Q2W (N=206)<br/>n (%)</b> |
|------------------------------------------|----------------------------------------|
| <i>Methylprednisolone</i>                | 3 (1.5)                                |
| <i>Dexamethasone</i>                     | 2 (1.0)                                |
| <i>Prednisone</i>                        | 1 (0.5)                                |
| <b>Immunosuppressant</b>                 | <b>1 (0.5)</b>                         |
| <i>Cyclosporine</i>                      | 1 (0.5)                                |
| <b>Biologics</b>                         | <b>0</b>                               |
| <b>Phototherapy or photochemotherapy</b> | <b>0</b>                               |

<sup>a</sup> Rescue therapy was defined as topical treatments (including TCS, TCI, and crisaborole) and systemic treatments (including oral corticosteroids, immunosuppressants, biologics, and phototherapy/phytotherapy). Abbreviations: LEB = lebrikizumab; N = number of patients in the analysis population; n = number of patients in the specified category; Q2W = every 2 weeks; TCS = topical corticosteroids.

**Table S2:** List of ADore study investigators

| Investigator Name                        | Site Address                                                                                                                                       |
|------------------------------------------|----------------------------------------------------------------------------------------------------------------------------------------------------|
| <b>Australia (12 patients, 4 sites)</b>  |                                                                                                                                                    |
| Samantha Eisman, MD                      | Sinclair Dermatology<br>2 Wellington Parade<br>Level 2<br>East Melbourne, Victoria, 3002<br>Australia                                              |
| Michael Freeman, MBBS, FRACGP, FACD      | The Skin Centre<br>Pindara Specialists Suites 29 Carrarra St<br>Suite 3.07 Level 3<br>Benowa, QLD, 4217<br>Australia                               |
| Lynda Spelman, MD                        | Veracity Clinical Research Pty Ltd<br>250 Ipswich Road<br>Suite 18 Level 1<br>Woolloongabba, QLD, 4102<br>Australia                                |
| Johanna Kuchel, MD                       | The Skin Hospital<br>121 Crown Street Darlinghurst<br>Sydney, NSW, 2010<br>Australia                                                               |
| <b>Canada (20 patients, 5 sites)</b>     |                                                                                                                                                    |
| Isaiah Day, MD                           | CARe Clinic<br>160-6900 Taylor Drive<br>Red Deer, Alberta, T4P 1K4<br>Canada                                                                       |
| Davindra Singh, MD                       | AvantDerm<br>45 Mill Street<br>Toronto, Ontario, M5A 3R6<br>Canada                                                                                 |
| Charles Lynde, MD                        | Lynderm Research Inc.<br>25 Main Street, Markham North<br>Markham, Ontario, L3P 1X2<br>Canada                                                      |
| Sheetal Sapra, MD                        | ICLS Dermatology & Plastic Surgery<br>1344 Cornwall Road<br>Suite 100<br>Oakville, Ontario, L6J 7W5<br>Canada                                      |
| Vimal Prajapati, MD                      | Dermatology Research Institute<br>8500 Blackfoot Trail SE<br>Suite 310 (Meadows Mile Professional Building)<br>Calgary, Alberta, T2J 7E1<br>Canada |
| <b>Poland (63 patients, 9 sites)</b>     |                                                                                                                                                    |
| Anna Rajchel, Prof. MD, PhD<br>2021-2022 | Zespol Naukowo - Lecznicy Iwolang Sp.<br>z o.o.<br>Ul. Kulczynskiego 1A<br>Iwonicz-Zdroj Województwo, Podkarpackie, 38-440<br>Poland               |
| Andrez Langner, MD<br>2020-2021          |                                                                                                                                                    |

| Investigator Name                                        | Site Address                                                                                              |
|----------------------------------------------------------|-----------------------------------------------------------------------------------------------------------|
| Grazyna Pulka, MD, PhD                                   | Grażyna Pulka Centrum Medyczne<br>All-med<br>Ul. Sienkiewicza 23<br>Krakow, Malopolskie, 30-033<br>Poland |
| Barbara Rewerska, MD, PhD                                | Diamond Clinic<br>Ul. Stefana Rogozinskiego 6/U3<br>Kraków, Małopolskie, 31-559<br>Poland                 |
| Magdalena Kolanko, MD, PhD                               | Provita Sp. z o.o.<br>Ul. Fabryczna 15B<br>Katowice. 40-611<br>Poland                                     |
| Beata Krecisz, MD                                        | Gabinet Dermatologiczny Al.<br>Popieluszki 56<br>Kielce, Świętokrzyskie, 25-155<br>Poland                 |
| Dorota Krasowska, Prof.                                  | Samodzielny Publiczny Szpital Kliniczny nr 1<br>Ulica Staszica 11H<br>Lublin, Lubelskie, 20-081<br>Poland |
| Monika Slowinska, MD, PhD                                | Centrum Medyczne Evimed<br>Ul. Woronicza 16<br>Warsaw, Mazowieckie, 02-625<br>Poland                      |
| Jacek Szepietowski, Prof                                 | CityClinic Przychodnia Lekarsko-Psychologiczna Sliczna 13<br>Wroclaw, 50-566<br>Poland                    |
| Aleksandra Lesiak, Prof                                  | Dermoklinika Centrum Medyczne<br>Al. Kosciuszki 93<br>Lodz Lodzkie, 90-436<br>Poland                      |
| <b>United States of America (111 patients, 37 sites)</b> |                                                                                                           |
| Dariusz Chrostowski, MD                                  | Advanced Asthma and Allergy<br>19316 US Route 11 Building IV<br>Suite C<br>Watertown, NY, 13601<br>US     |
| Mark Lee, MD                                             | Progressive Clinical Research<br>P.A 1973 NW Loop 410<br>Suite 106<br>San Antonio, TX, 78213<br>US        |
| Abel Jarell, MD                                          | ActivMed Practices & Research Inc.<br>110 Corporate Drive<br>Suite 2<br>Portsmouth, NH, 3801<br>US        |
| Tracy Bridges, MD                                        | Georgia Pollens Clinical Research Centers Inc.<br>105 Spanish Court<br>Albany, GA, 31707<br>US            |

| Investigator Name     | Site Address                                                                                                  |
|-----------------------|---------------------------------------------------------------------------------------------------------------|
| Leon Kircik, MD       | Skin Sciences, PLLC<br>1169 Eastern Parkway<br>Suite 2310<br>Louisville, KY, 40217<br>US                      |
| Vivian Laquer, MD     | First OC Dermatology<br>17271 Brookhurst St<br>Fountain Valley, CA, 92708<br>US                               |
| Jeffrey Weinberg, MD  | Forest Hills Dermatology Group<br>80-02 Kew Gardens RD Concourse<br>Suite 107<br>Kew Gardens, NY, 11415<br>US |
| Syed Ali, MD          | Acclaim Dermatology PLLC 17510 W Grand Pkwy<br>Suite 385<br>Sugar Land, TX, 77479<br>US                       |
| Pearl Kwong, MD, PhD  | Solutions Through Advanced Research Inc 10175 Fortune<br>Pkwy<br>Suite 1201<br>Jacksonville, FL, 32256<br>US  |
| Iftikhar Hussain, MD  | Vital Prospects Clinical Research Institute, P.C. 7307 S. Yale<br>Ave.<br>Suite 200<br>Tulsa, OK, 74136<br>US |
| Eddie Armas, MD       | Well Pharma Medical Research Corp.<br>7000 SW 97th Ave.<br>Suite 210<br>Miami, FL, 33173<br>US                |
| Benjamin Lockshin, MD | DermAssociates<br>15245 Shady Grove Road<br>Suite 480<br>Rockville, MD, 20850<br>US                           |
| Jennifer Soung, MD    | Southern California Dermatology, Inc.<br>1125 E 17th St<br>Suite W244<br>Santa Ana, CA, 92701<br>US           |
| David Pariser, MD     | Virginia Clinical Research, Inc<br>6160 Kempsville Circle<br>Suite 200A<br>Norfolk, VA, 23502,<br>US          |
| Scott Fretzin, MD     | Dawes Fretzin Clinical Research Group, LLC<br>7910 North Shadeland Avenue<br>Indianapolis, IN, 46250,<br>US   |

| Investigator Name                 | Site Address                                                                                            |
|-----------------------------------|---------------------------------------------------------------------------------------------------------|
| Jill Waibel, MD                   | Miami Dermatology & Laser Research, LLC<br>7800 SW 87th Avenue<br>Suite B-200<br>Miami, FL, 33173<br>US |
| Lacey Kruse, MD<br>2021-2022      | Northwestern University<br>225 E. Chicago Ave<br>Box #107<br>Chicago, IL, 60611<br>US                   |
| Amy Paller, MD<br>2020-2021       |                                                                                                         |
| Seth Forman, MD                   | ForCare Clinical Research<br>15416 N Florida Avenue<br>Tampa, FL, 33613<br>US                           |
| Jamie Weisman, MD                 | Advanced Medical Research<br>5730 Glenridge Dr.<br>Suite T-100<br>Sandy Springs, GA, 30328<br>US        |
| Kevin Do, MD<br>2021-2022         | MD Studies<br>11160 Warner Ave.<br>Suite 213<br>Fountain Valley, CA, 92708<br>US                        |
| Ronald Schilling, MD<br>2020-2021 |                                                                                                         |
| Scott Dinehart, MD                | Arkansas Research Trials, LLC<br>4261 Stockton Drive<br>Suite 203<br>North Little Rock, AR, 72117<br>US |
| Brian Feinstein, DO               | Encore Medical Research, LLC<br>5555 Hollywood Blvd<br>Suite 101<br>Hollywood, FL, 33021<br>US          |
| Patricia Lee, MD                  | Center for Clinical Studies<br>451 North Texas Avenue<br>Webster, TX, 77598<br>US                       |
| George Schmieder, DO              | Park Avenue Dermatology<br>906 Park Avenue<br>Orange Park, FL, 32073<br>US                              |
| Sidney Smith, MD                  | Georgia Skin & Cancer Clinic<br>900 Mohawk St<br>Suite E<br>Savannah, GA, 31419<br>US                   |
| Mercedes Gonzalez-Blanco, MD      | Pediatric Skin Research, LLC<br>4425 Ponce de Leon Blvd<br>Suite 115<br>Coral Gables, FL, 33146<br>US   |



| Investigator Name               | Site Address                                                                                                                                                                   |
|---------------------------------|--------------------------------------------------------------------------------------------------------------------------------------------------------------------------------|
| Julie Shepard, MD               | Ohio Pediatric Research Association<br>7200 Poe Ave<br>Suite 200<br>Dayton, OH, 45414<br>US                                                                                    |
| Lawrence Parish, MD             | Paddington Testing Co, Inc<br>1845 Walnut Street<br>Suite 1650<br>Philadelphia, PA, 19103<br>US                                                                                |
| Kelechi Azuogu, MD              | Encore Imaging & Medical Research<br>9720 Jones RD<br>Suite 130<br>Houston, TX, 77065<br>US                                                                                    |
| Alison Fischer, MD<br>2021-2022 | Central States Research, LLC<br>4765 E. 91st St.<br>Suite 200<br>Tulsa, OK, 74136<br>US                                                                                        |
| Wynn Tom, MD                    | University of California, San Diego/Rady Children's Hospital<br>San Diego - Pediatric & Adolescent Dermatology<br>3020 Children's Way<br>MC 5092<br>San Diego, CA, 92123<br>US |
| Raja Sivamani, MD               | Integrative Skin Science and Research<br>1495 River Park Dr<br>Suite 200<br>Sacramento, CA, 95815<br>US                                                                        |
| Dareen Siri, MD                 | Sneeze, Wheeze, & Itch Associates, LLC<br>2010 Jacobssen Dr.<br>Normal, IL, 61761<br>US                                                                                        |
| Erin Boh, MD, PhD               | Tulane University Health Sciences Center Department of<br>Dermatology<br>1430 Tulane Avenue<br>#8036<br>New Orleans, LA, 70112<br>US                                           |
| Mirel Sanchez, MD               | Sanchez Clinical Research, Inc<br>11468 Quail Roost Drive<br>Miami, FL, 33157<br>US                                                                                            |
| John Browning, MD               | Texas Dermatology and Laser Specialists<br>3320 Oakwell Court<br>San Antonio, TX, 78218<br>US                                                                                  |
| Angela Moore, MD                | Arlington Research Center, Inc.<br>711 East Lamar Blvd<br>Suite 200<br>Arlington, TX, 76011, US                                                                                |
